# Supplementary material for: Epigenetic Deregulation of Protein Tyrosine Kinase 6 Promotes Carcinogenesis of Oral Squamous Cell Carcinoma
Source: MDPI journal article supplement (doi:10.3390/ijms23094495), 2022-04-19

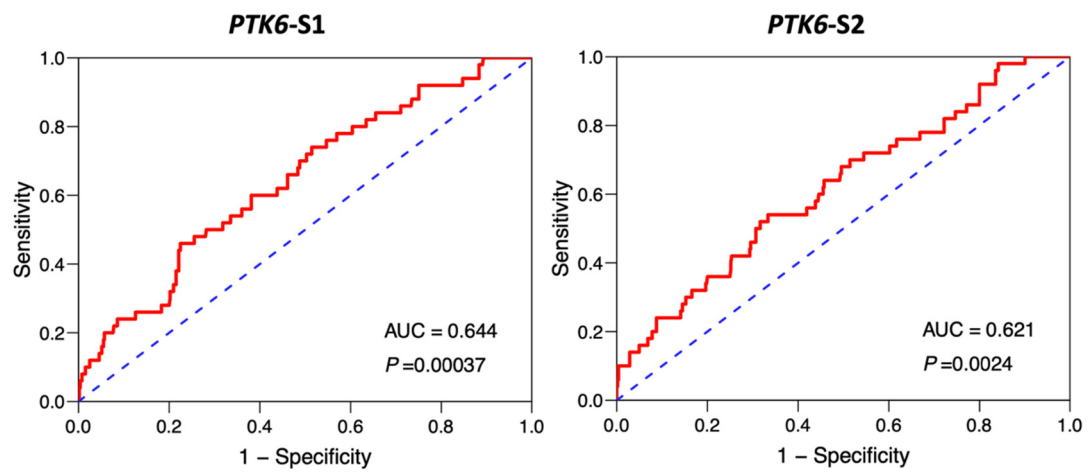

**Supplementary Figure S1.** The TCGA data were used to show the diagnostic value of *PTK6* hypomethylation in HNSC by plotting the ROC curve.

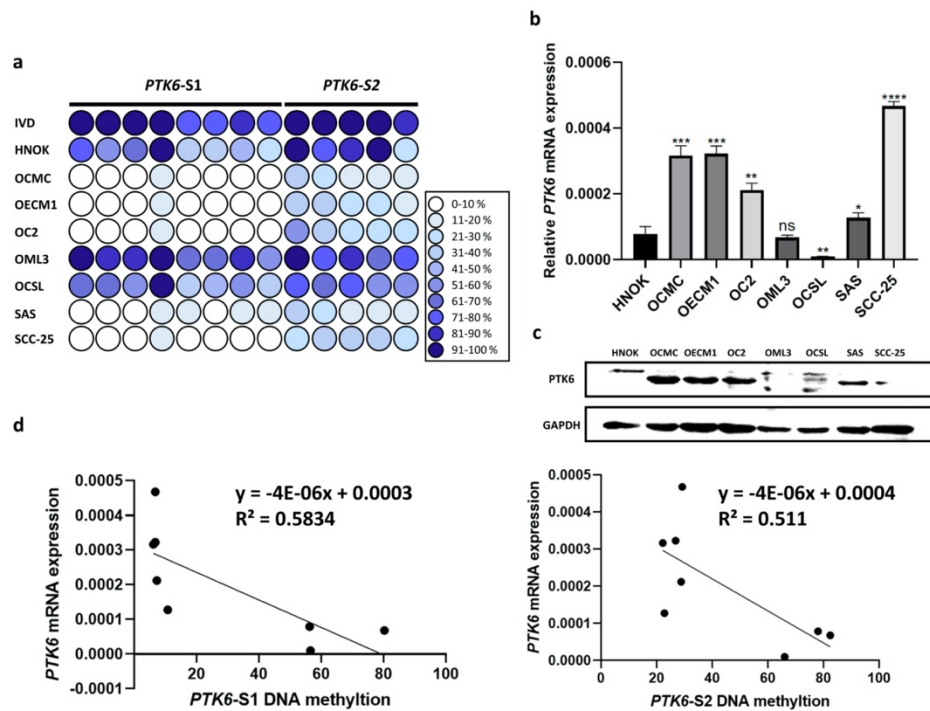

**Supplementary Figure S2. Methylation, transcriptional, and translational levels of PTK6 in HNOK and OSCC cell lines.** (a) The methylation of *PTK6* was detected in HNOK and OSCC cell lines. (b) The mRNA expression of *PTK6* in HNOK and OSCC cell lines. (c) The protein expression of PTK6 in HNOK and OSCC cell lines. (d) The correlation of the methylation of *PTK6* and the *PTK6* transcription level in OSCC cell lines.

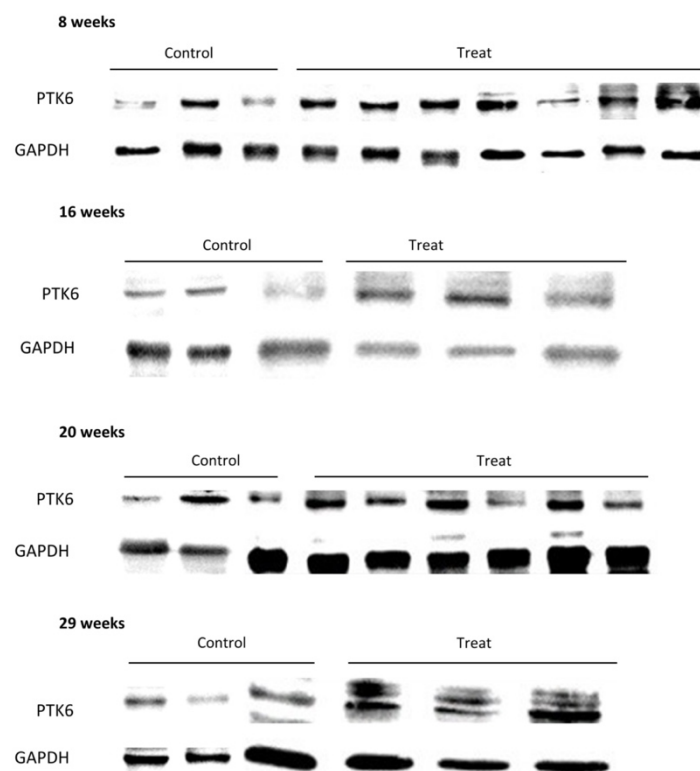

**Supplementary Figure S3. Western blot showed the protein expression of PTK6 in the tongue tissues of the OSCC mice at different time points.**

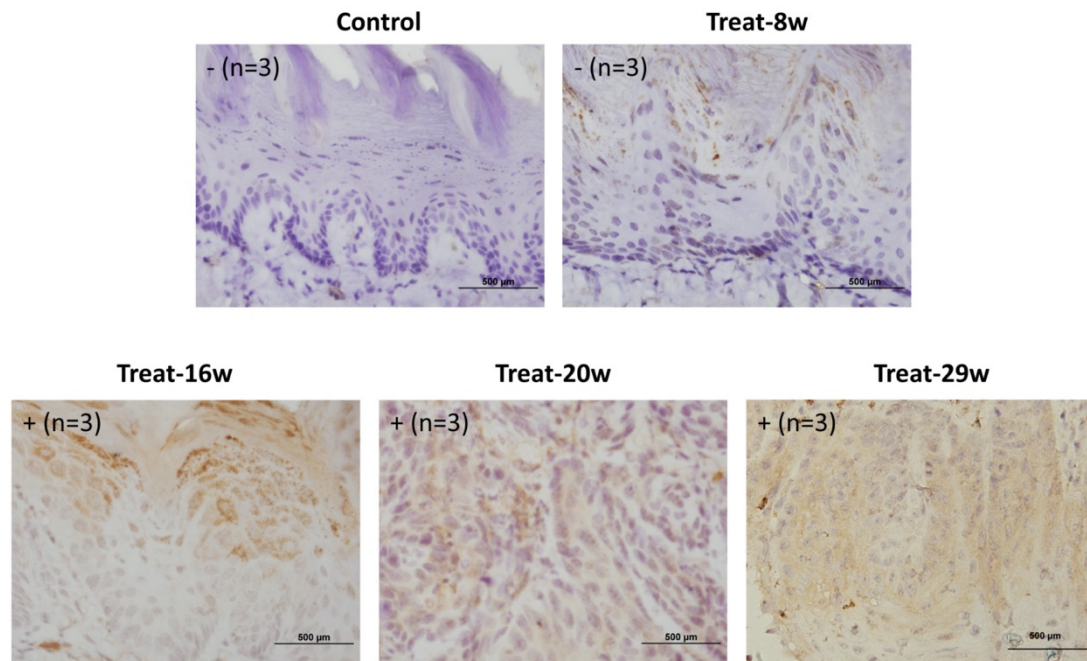

**Supplementary Figure S4. Immunohistochemistry staining showed the protein expression of PTK6 in the tongue tissues of the OSCC mice at different time points.**

**Table S1. The primer sequences were used in bisulfite genomic DNA sequencing and qPCR**

| Bisulfite genomic DNA pyrosequencing primer |                                    |                                             |  |
|---------------------------------------------|------------------------------------|---------------------------------------------|--|
| Human-PTK6-F1                               | Accession number :<br>NC_000020.11 | GGGATTAGGTTTATTTGGGTTTAAAGTAT               |  |
| Human-PTK6-R1                               |                                    | CCACTACTCCTCCTCCTAACCA                      |  |
| Human-PTK6-S1                               |                                    | GGTTTTTGGGATTTAAGTT                         |  |
| Human-PTK6-F2                               |                                    | GTGGTTAGGAAGGAGGAGTAG                       |  |
| Human-PTK6-R2                               |                                    | CCTAAACAACCCAAAACCTATC                      |  |
| Human-PTK6-S2                               |                                    | TTTAGGGTTATGTGTTTATAATT                     |  |
| Mouse-PTK6-F1                               | Accession number :<br>NC_000068.8  | TAGAGGGTGGATATTGTTTAGGGA                    |  |
| Mouse-PTK6-R1                               |                                    | TTACATAAAATACCCCAT                          |  |
| Mouse-PTK6-S1                               |                                    | TTTATAATTTTAGTATTGGTTAAT                    |  |
| Mouse-PTK6-F2                               |                                    | GGGTAGTATGGGAGGTGAATT                       |  |
| Mouse-PTK6-R2                               |                                    | AGCTGGACATCACCTCCACAACGAAAAACCCACACCACCTCTA |  |
| Mouse-PTK6-S2                               |                                    | GTATGGGAGGTGAATTAA                          |  |

  

| qPCR primer               |                                                     |                          | Product length |
|---------------------------|-----------------------------------------------------|--------------------------|----------------|
| Human-PTK6-RTF            | Accession number :<br>NM_005975.4<br>NM_001256358.2 | TGCCCCATTGGGATGACTG      | 221            |
| Human-PTK6-RTR            |                                                     | GTACAGCGCCAGGATGTGTTT    |                |
| Mouse-PTK6-RTF            | Accession number :<br>NM_009184.2<br>NM_001356304.1 | GGCTATGTGCCTCACAACCTAC   | 76             |
| Mouse-PTK6-RTR            |                                                     | GGGAGATGCAACCAAGAAG      |                |
| Human and Mouse-GAPDH-RTF | Accession number :<br>NM_002046.7<br>NM_001289726.1 | CCCCTTCATTGACCTCAACTACAT | 135            |
| Human and Mouse-GAPDH-RTR |                                                     | CGCTCCTGGAAGATGGTGA      |                |

The original sequences detected:

Human-PTK6 S1:

CCGGACGGACGAGGAGCTGAGCTTCCGCGCGGGGGACGTCTTCCACGTGG  
CC

Human-PTK6 S2:

TACCTGGCCGAGAGGGAGACGGTGGAGTCGGAACCGTGCG

CTGGGTGTGGCTGCTTCCCGGCCTGTCATGAGGAAGTGGGACGGCCCGCCTGCC+1AC  
GCCCAGCTCTGGGTGCTCCAGCTGGGCCACAGCCTGGTCCTGCCGCTGCGCCCGCCC  
GCCATGGTGTCCCGGGACCAGGCTCACCTGGGCCCAAGTATGTGGGCCTCTGGGACT  
TCAAGTCCTGGACGGACGAGGAGCTGAGCTTCCGCGCGGGGGACGTCTTCCACGTGG  
CCAGGAAGGAGGAGCAGTGGTGGTGGGCCACGCTGCTGGACGAGGCGGGTGGGGCC  
GTGGCCCAGGGCTATGTGCCCCACAACCTACCTGGCCGAGAGGGAGACGGTGGAGTCG  
GAACCGTGCG

Original Sequence Editor | Converted Sequence | Graphic View | Final Primer Set

ΔG Tm 580 590 600 610 620 630 640 650 660 670 680 690 700

10.6 7.2 7.7 160

GGGATTAGGTTTATTGGGTTTAAAGTA

GGTTTTGGGATTTTAAAGTT

CGGGATTAGGTTTATTGGGTTTAAAGTATGTGGGTTTGGGATTTTAAAGTTCTGGACGGACGAGGAGTTGAGTTTCGCCGGGGGACGTTTTCAGCTGGTTAGGAAGGAGGAGTGTGGTGGTGGGCGCCCTAATCCAATAAACCCAAAATTCATACACCCAAAACCCCTAAATTCAAAGCGTCGCTGCTCTCACTCAAAGCGCGCCCGCTGCATAAATGCACCAATCTTCTCTCCTCATCACCAACCC

ATCACCAACCC

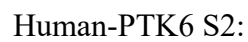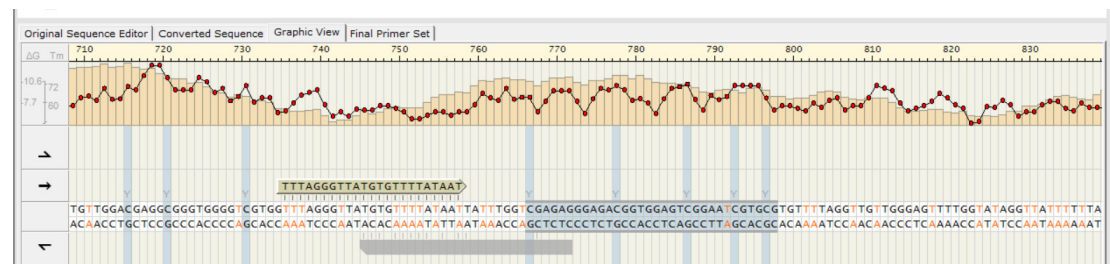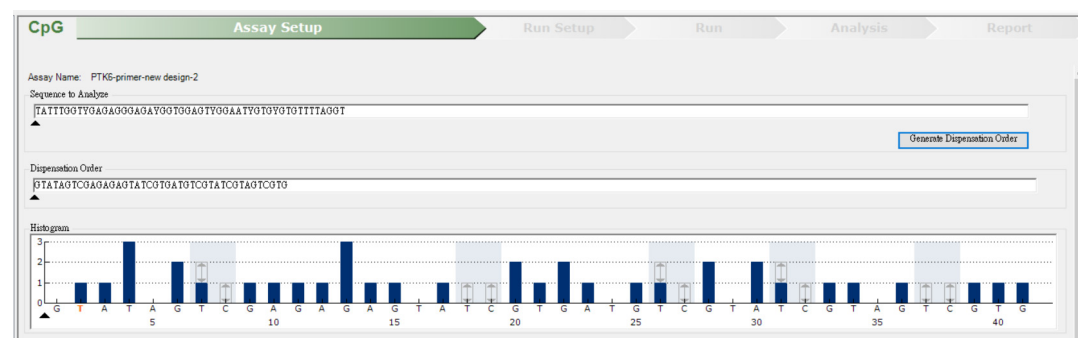

(Y means possible methylation sites; orange T means unmethylated cytosines were convert to thymine after bisulfite treatment and PCR)

Raw data of western blotting

Supplementary Fig. 2

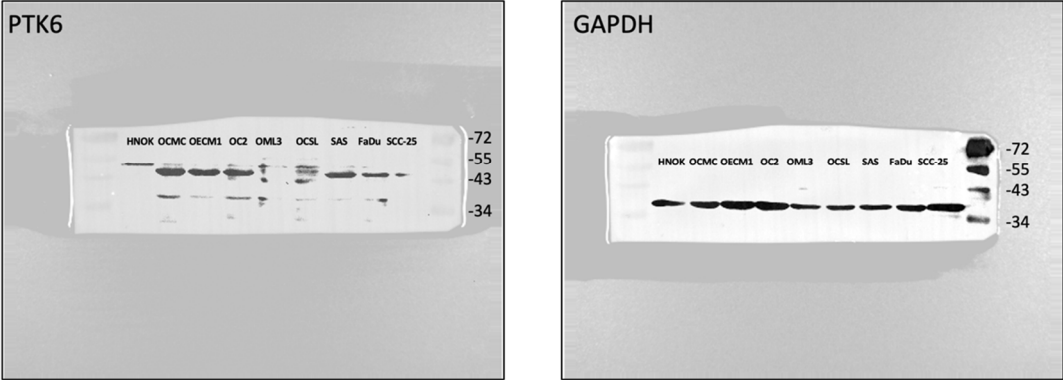

Figure 3a

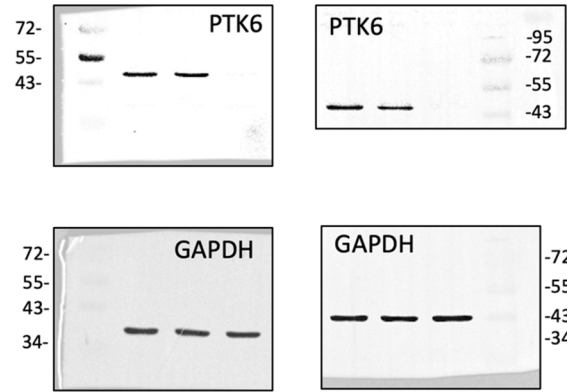

Figure 4a

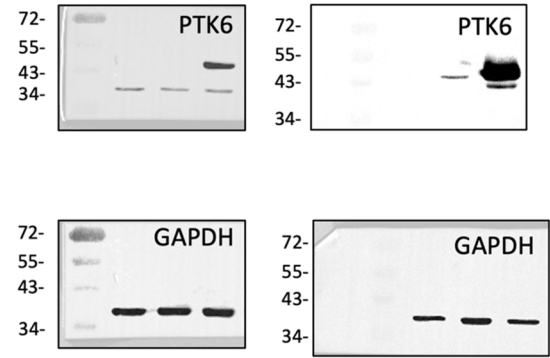

Figure 6

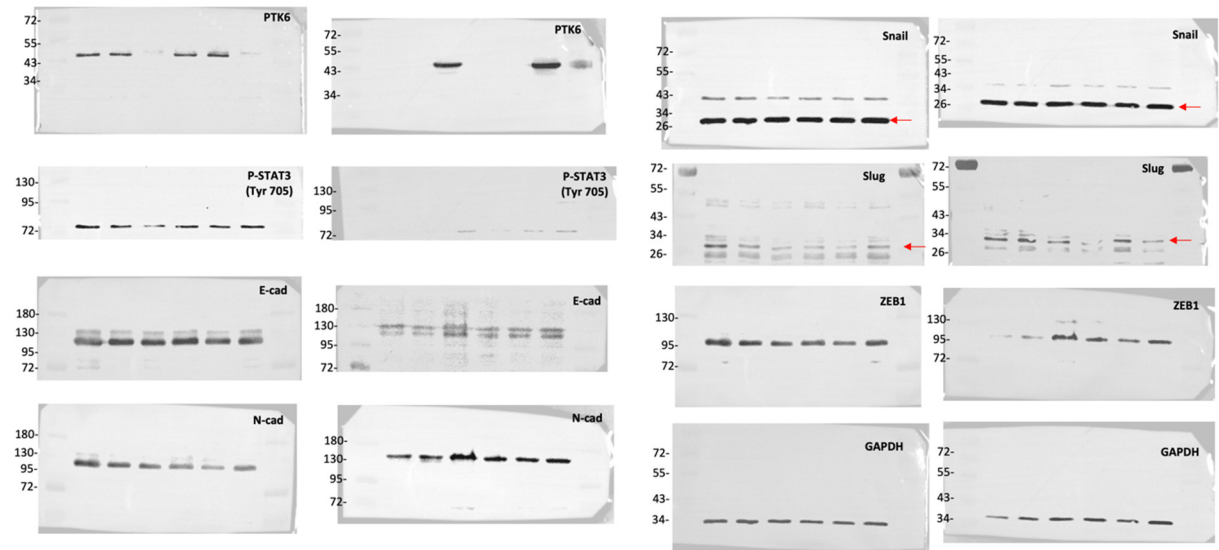

Supplement: s1 [file s1]
